# Supplementary material for: The self-assembly mechanism of tetra-peptides from the motif of β-amyloid peptides: a combined coarse-grained and all-atom molecular dynamics simulation
Source: Royal Society of Chemistry journal article supplement (doi:10.1039/c6ra18204f), 2016-01-01
Supplement: c6ra18204f1.pdf [file c6ra18204f1.pdf]

### Supporting information

#### **The self-assemble mechanism of tetra-peptides from the motif of $\beta$ -amyloid peptide: a combined coarse grain and all atom molecular dynamics simulation.**

Lijun Liang<sup>†,\*</sup>, Li-Wei Wang<sup>‡</sup>, Jia-Wei Shen<sup>‡,\*</sup>

<sup>†</sup>College of Life Information Science and Instrument Engineering, Hangzhou Dianzi University, Hangzhou, 310018, People's Republic of China

<sup>‡</sup>School of Medicine, Hangzhou Normal University, Hangzhou 310016, People's Republic of China

\* Corresponding authors.

Fax: +86 571 87951895.

E-mail addresses:

[michael.lijunl@gmail.com](mailto:michael.lijunl@gmail.com)

[shen.jiawei@hotmail.com](mailto:shen.jiawei@hotmail.com)

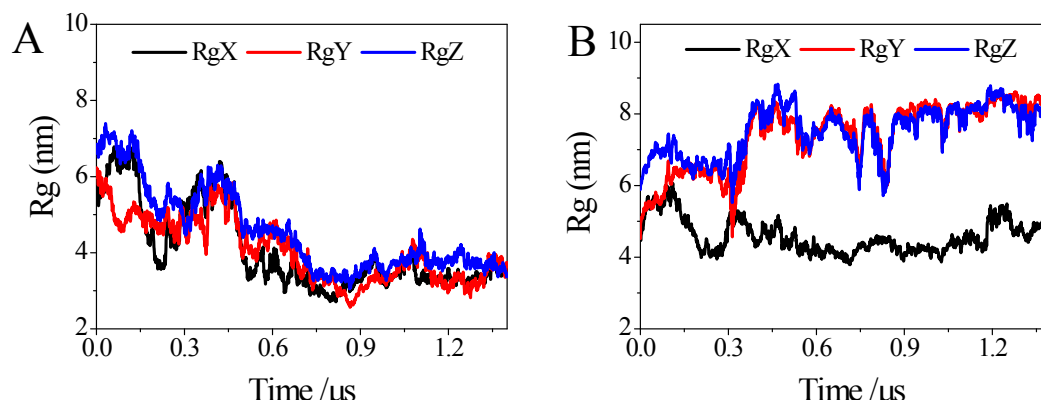

Figure S1. The evolution of radius of gyration (Rg) in the self-assembly process of two different types of tetra-peptides: (A) VFFA and (B) KFFA. Change of the  $x$ ,  $y$  and  $z$  components of Rg are represented by black line, red line and blue line, respectively.

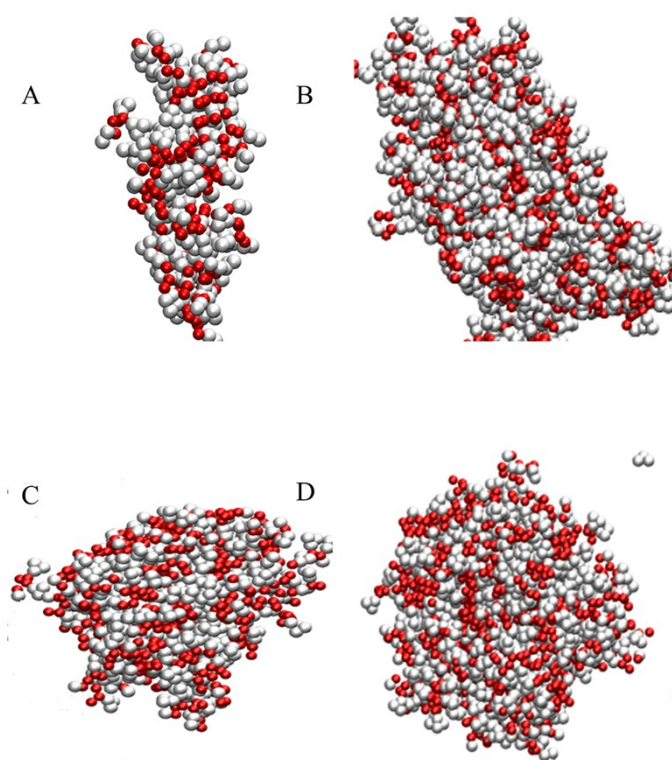

Figure S2. The configuration at the concentration of (A) 10 mg/mL and (B) 40 mg/mL for KFFA, and concentration of (C) 10 mg/mL and (D) 40 mg/mL for VFFA at the end of CG simulations.

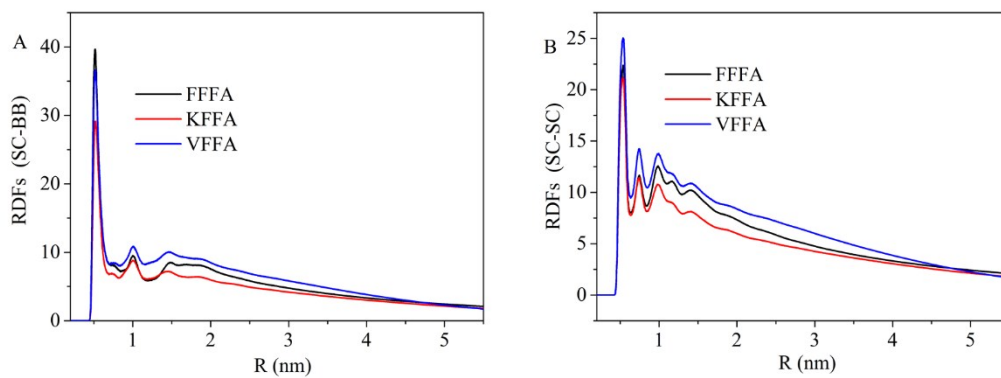

Figure S3. The radial distribution functions of (A): side chains beads to main chain beads and (B) side chains beads to side chains beads from last 1  $\mu$ s simulation in three different systems: FFFA (black line), KFFA (red line), and VFFA (blue line).
